# Supplementary material for: Base editing in bovine embryos reveals a species-specific role of SOX2 in regulation of pluripotency
Source: PubMed Central journal article supplement (PMC9286228; doi:10.1371/journal.pgen.1010307), 2022-07-05
Supplement: pgen.1010307.s007.pdf [file pgen.1010307.s007.pdf]

**S1\_Table. The synthesis of sgRNAs sequence**

| Gene name    | Gene ID | sgRNA  | Exon | Sequence (5' – 3')                                           |
|--------------|---------|--------|------|--------------------------------------------------------------|
| <i>SMAD4</i> | 540248  | S-gRNA | 1    | FP: CACCTGTTACCATACAGAGAACAT<br>RP: AAACATGTTCTCTGTATGGTAACA |
| <i>TEAD4</i> | 526771  | T-gRNA | 5    | FP: CACCGCCACATCCAGGTGCTGGCT<br>RP: AAACAGCCAGCACCTGGATGTGGC |
| <i>CDX2</i>  | 618679  | C-gRNA | 1    | FP: CACCGGACTACGGCGGATACCATG<br>RP: AAACCATGGTATCCGCCGTAGTCC |
| <i>CDX2</i>  | 618679  | sgRNA1 | 1    | FP: CACCCCCCGCAGTACCCGGACTA<br>RP: AAAGTAGTCCGGGTACTGCGGGGG  |
| <i>CDX2</i>  | 618679  | sgRNA2 | 1    | FP: CACCCCGTTCCAGTCCTCGCGGAG<br>RP: AAACCTCCGCGAGGACTGGAACGG |
| <i>CDX2</i>  | 618679  | sgRNA3 | 1    | FP: CACCTTGCTGCAGACGCTCAACCC<br>RP: AAACGGGTAGACGTCTGCAGCAA  |
| <i>OCT4</i>  | 282316  | sgRNA1 | 1    | FP: CACCGCTTCCAAGGCCTCCCGGT<br>RP: AAACACCGGGAGGCCCTTGGAAGC  |
| <i>OCT4</i>  | 282316  | sgRNA2 | 1    | FP: CACCCCTCAGCCCGAGGGCGAGG<br>RP: AAACCTCGCCCTCGGGCTGAGGG   |
| <i>SOX2</i>  | 784383  | sgRNA1 | 1    | FP: CACCCCGCAGCAAACCTTCGGGGGG<br>RP: AAACCCCCCGAAGTTTGCTGCGG |
| <i>SOX2</i>  | 784383  | sgRNA2 | 1    | FP: CACCCGGCAACCAGAAGAACAGCC<br>RP: AAACGGCTGTTCTTCTGGTTGCCG |
| <i>SOX2</i>  | 784383  | sgRNA3 | 1    | FP: CACCTATTCTCAGCAGGGCACCCC<br>RP: AAACGGGGTGCCCTGCTGAGAATA |
