# Supplementary material for: Base editing in bovine embryos reveals a species-specific role of SOX2 in regulation of pluripotency
Source: PubMed Central journal article supplement (PMC9286228; doi:10.1371/journal.pgen.1010307), 2022-07-05
Supplement: pgen.1010307.s008.pdf [file pgen.1010307.s008.pdf]

**S2\_ Table. The primers information of sgRNA template for in vitro transcription**

| <b>sgRNA</b>    | <b>Primers' name</b> | <b>Sequence (5' – 3')</b>                |
|-----------------|----------------------|------------------------------------------|
| S-gRNA          | S-g1-T7-F            | TTAATACGACTCACTATAGTGTTACCATAACAGAGAACAT |
| T-gRNA          | T-g1-T7-F            | TTAATACGACTCACTATAGCCACATCCAGGTGCTGGCT   |
| C-gRNA          | C-g1-T7-F            | TTAATACGACTCACTATAGGACTACGGCGGATACCATG   |
| CDX2-<br>sgRNA1 | C-g2-T7-F            | TTAATACGACTCACTATAGCCCCCGCAGTACCCGGACTA  |
| CDX2-<br>sgRNA2 | C-g3-T7-F            | TTAATACGACTCACTATAGCCGTTCCAGTCCTCGCGGAG  |
| CDX2-<br>sgRNA3 | C-g4-T7-F            | TTAATACGACTCACTATAGTTGCTGCAGACGCTCAACCC  |
| OCT4-<br>sgRNA1 | OCT4-g1-<br>T7-F     | TAATACGACTCACTATAGGCTTCCAAGGGCCTCCCGGT   |
| OCT4-<br>sgRNA2 | OCT4-g2-<br>T7-F     | TAATACGACTCACTATAGGCCCTCAGCCCGAGGGCGAGG  |
| SOX2-<br>sgRNA1 | SOX2-g1-<br>T7-F     | TAATACGACTCACTATAGGCCGCAGCAAACCTTCGGGGGG |
| SOX2-<br>sgRNA2 | SOX2-g2-<br>T7-F     | TAATACGACTCACTATAGGCGGCAACCAGAAGAACAGCC  |
| SOX2-<br>sgRNA3 | SOX2-g3-<br>T7-F     | TAATACGACTCACTATAGGTATTCTCAGCAGGGCACCCC  |
|                 | sgRNA-R              | AAAAGCACCGACTCGGTGCC                     |
