# Supplementary material for: Base editing in bovine embryos reveals a species-specific role of SOX2 in regulation of pluripotency
Source: PubMed Central journal article supplement (PMC9286228; doi:10.1371/journal.pgen.1010307), 2022-07-05
Supplement: pgen.1010307.s009.pdf [file pgen.1010307.s009.pdf]

**S3\_Table. Nested PCR primer sequences for preparing Sanger sequencing samples**

| Gene         | Gene ID | Target sgRNAs                                       | Primers' name | Sequence (5' – 3')                                       |
|--------------|---------|-----------------------------------------------------|---------------|----------------------------------------------------------|
| <i>SMAD4</i> | 540248  | S-gRNA                                              | S-g1-1        | FP: TCTAACAATTTTCCTTGCAAC<br>RP: CCTGTATTGATAATATCTGTGCT |
|              |         |                                                     | S-g1-2        | FP: TCCGAAAGATCAAAATTGCT<br>RP: ACAGTATCTAAAGAGACGGAG    |
| <i>TEAD4</i> | 526771  | T-gRNA                                              | T-g1-1        | FP: CTGAGAGGGTGCTGTGTCTC<br>RP: AACGTCCAGTCCCAGAGAGT     |
|              |         |                                                     | T-g1-2        | FP: GGACCGCACTTCTGTTTAGC<br>RP: TGGGGCTTACAGGGTTACAG     |
| <i>CDX2</i>  | 618679  | C-gRNA<br>CDX2-sgRNA1<br>CDX2-sgRNA2<br>CDX2-sgRNA3 | C-g-1         | FP: ATGGTGAGGTTGCGCCGTC<br>RP: GCTTTACACTGAACGCGGCT      |
|              |         |                                                     | C-g-2         | FP: TACGTGAGCTACCTCCTGGAC<br>RP: CCCCCTATCCCCTACTCA      |
| <i>OCT4</i>  | 282316  | OCT4-sgRNA1<br>OCT4-sgRNA2                          | OCT4-g-1      | FP: GCCAGAGGTCAAGGCTAGTG<br>RP: CTCACCTGCGGTTCTCTCTT     |
|              |         |                                                     | OCT4-g-2      | FP: CGGGACACCTCGTTCTGAC<br>RP: CTTCGCCTGCTCCCTTCCTG      |
| <i>SOX2</i>  | 784383  | SOX2-sgRNA1<br>SOX2-sgRNA2<br>SOX2-sgRNA3           | SOX2-g-1      | FP: CCCCCAAATTATTCTTCGCCTG<br>RP: CTTTGAAAATGTCTCCCCCG   |
|              |         |                                                     | SOX2-g-2      | FP: GCCCGCATGTACAACATGATGG<br>RP: GGGCAGTGTGCCGTTAATGG   |
