# Supplementary material for: Base editing in bovine embryos reveals a species-specific role of SOX2 in regulation of pluripotency
Source: PubMed Central journal article supplement (PMC9286228; doi:10.1371/journal.pgen.1010307), 2022-07-05
Supplement: pgen.1010307.s010.pdf [file pgen.1010307.s010.pdf]

**S4\_ Table. The predicted potential 6 off-target sites for *SMAD4***

| <b>Name</b> | <b>Chromosome</b> | <b>Sequence information</b> |
|-------------|-------------------|-----------------------------|
| OFF 1       | 2                 | TGTTACCATAGCAGAGGACAT       |
| OFF 2       | 23                | TTTTACCATAAAGAGAACTT        |
| OFF 3       | 11                | TCTTACCATTCAGAGAAGCAT       |
| OFF 4       | 7                 | TGTTTGCATACAGAGAAGAT        |
| OFF 5       | 9                 | TGATCCATACAGAGAAGAT         |
| OFF 6       | 1                 | TGTTACCAGCCAGAGAACACT       |
