# Supplementary material for: Base editing in bovine embryos reveals a species-specific role of SOX2 in regulation of pluripotency
Source: PubMed Central journal article supplement (PMC9286228; doi:10.1371/journal.pgen.1010307), 2022-07-05
Supplement: pgen.1010307.s011.pdf [file pgen.1010307.s011.pdf]

**S5\_ Table. PCR primer sequences for preparing targeted next generation sequencing samples**

| Amplified sites | Chromosome | Primers' name | Sequence (5' – 3')               |
|-----------------|------------|---------------|----------------------------------|
| S-gRNA-ON       | 24         | S-g1-ON-F1    | ATCACGGGAGAGAGTGAAACATTTCGCC     |
|                 |            | S-g1-ON-F2    | TTAGGCGGAGAGAGTGAAACATTTCGCC     |
|                 |            | S-g1-ON-F3    | ACAGTGGGAGAGAGTGAAACATTTCGCC     |
|                 |            | S-g1-ON-F4    | CAGATCGGAGAGAGTGAAACATTTCGCC     |
|                 |            | S-g1-ON-F5    | TAGCTTGGAGAGAGTGAAACATTTCGCC     |
|                 |            | S-g1-ON-F6    | GGCTACGGAGAGAGTGAAACATTTCGCC     |
|                 |            | S-g1-ON-R1    | CGATGTAAAGAGACGGAGCAAGCATAAA     |
|                 |            | S-g1-ON-R2    | TGACCAAAAGAGACGGAGCAAGCATAAA     |
|                 |            | S-g1-ON-R3    | GCCAATAAAGAGACGGAGCAAGCATAAA     |
|                 |            | S-g1-ON-R4    | ACTTGAAAAGAGACGGAGCAAGCATAAA     |
|                 |            | S-g1-ON-R5    | GATCAGAAAGAGACGGAGCAAGCATAAA     |
| S-gRNA-OFF1     | 2          | S-g1-OFF1-F1  | ATCACGTCTTTGTGCAGAATGGGGGT       |
|                 |            | S-g1-OFF1-F2  | TTAGGCTCTTTGTGCAGAATGGGGGT       |
|                 |            | S-g1-OFF1-F3  | ACAGTGTCTTTGTGCAGAATGGGGGT       |
|                 |            | S-g1-OFF1-F4  | CAGATCTCTTTGTGCAGAATGGGGGT       |
|                 |            | S-g1-OFF1-F5  | TAGCTTTCTTTGTGCAGAATGGGGGT       |
|                 |            | S-g1-OFF1-F6  | GGCTACTCTTTGTGCAGAATGGGGGT       |
|                 |            | S-g1-OFF1-R1  | CGATGTGATGATTCCCGAGTGGGAGC       |
|                 |            | S-g1-OFF1-R2  | TGACCAGATGATTCCCGAGTGGGAGC       |
|                 |            | S-g1-OFF1-R3  | GCCAATGATGATTCCCGAGTGGGAGC       |
|                 |            | S-g1-OFF1-R4  | ACTTGAGATGATTCCCGAGTGGGAGC       |
|                 |            | S-g1-OFF1-R5  | GATCAGGATGATTCCCGAGTGGGAGC       |
| S-gRNA-OFF2     | 23         | S-g1-OFF2-F1  | ATCACGAATTCACATCATGCTTTTGT TTCAT |
|                 |            | S-g1-OFF2-F2  | TTAGGCAATTCACATCATGCTTTTGT TTCAT |
|                 |            | S-g1-OFF2-F3  | ACAGTGAATTCACATCATGCTTTTGT TTCAT |
|                 |            | S-g1-OFF2-F4  | CAGATCAATTCACATCATGCTTTTGT TTCAT |
|                 |            | S-g1-OFF2-F5  | TAGCTTAATTCACATCATGCTTTTGT TTCAT |
|                 |            | S-g1-OFF2-F6  | GGCTACAATTCACATCATGCTTTTGT TTCAT |
|                 |            | S-g1-OFF2-R1  | CGATGTGCACATGCAGAGATATTTTCTAAGT  |

| Amplified sites | Chromosome | Primers' name | Sequence (5' – 3')              |
|-----------------|------------|---------------|---------------------------------|
|                 |            | S-g1-OFF2-R2  | TGACCAGCACATGCAGAGATATTTTCTAAGT |
|                 |            | S-g1-OFF2-R3  | GCCAATGCACATGCAGAGATATTTTCTAAGT |
|                 |            | S-g1-OFF2-R4  | ACTTGAGCACATGCAGAGATATTTTCTAAGT |
|                 |            | S-g1-OFF2-R5  | GATCAGGCACATGCAGAGATATTTTCTAAGT |
| S-gRNA-OFF3     | 11         | S-g1-OFF3-F1  | ATCACGGGCGCCTTGATTAATACCCC      |
|                 |            | S-g1-OFF3-F2  | TTAGGCGGCGCCTTGATTAATACCCC      |
|                 |            | S-g1-OFF3-F3  | ACAGTGGGCGCCTTGATTAATACCCC      |
|                 |            | S-g1-OFF3-F4  | CAGATCGGCGCCTTGATTAATACCCC      |
|                 |            | S-g1-OFF3-F5  | TAGCTTGGCGCCTTGATTAATACCCC      |
|                 |            | S-g1-OFF3-F6  | GGCTACGGCGCCTTGATTAATACCCC      |
|                 |            | S-g1-OFF3-R1  | CGATGTGCAACTACCGTGAGAGTTCA      |
|                 |            | S-g1-OFF3-R2  | TGACCAGCAACTACCGTGAGAGTTCA      |
|                 |            | S-g1-OFF3-R3  | GCCAATGCAACTACCGTGAGAGTTCA      |
|                 |            | S-g1-OFF3-R4  | ACTTGAGCAACTACCGTGAGAGTTCA      |
|                 |            | S-g1-OFF3-R5  | GATCAGGCAACTACCGTGAGAGTTCA      |
| S-gRNA-OFF4     | 7          | S-g1-OFF4-F1  | ATCACGACCAGACGAGGTACTGTAAC TTT  |
|                 |            | S-g1-OFF4-F2  | TTAGGCACCAGACGAGGTACTGTAAC TTT  |
|                 |            | S-g1-OFF4-F3  | ACAGTGACCAGACGAGGTACTGTAAC TTT  |
|                 |            | S-g1-OFF4-F4  | CAGATCACCAGACGAGGTACTGTAAC TTT  |
|                 |            | S-g1-OFF4-F5  | TAGCTTACCAGACGAGGTACTGTAAC TTT  |
|                 |            | S-g1-OFF4-F6  | GGCTACACCAGACGAGGTACTGTAAC TTT  |
|                 |            | S-g1-OFF4-R1  | CGATGTCCGGAGGAGCAGACTAGTGAT     |
|                 |            | S-g1-OFF4-R2  | TGACCACCGGAGGAGCAGACTAGTGAT     |
|                 |            | S-g1-OFF4-R3  | GCCAATCCGGAGGAGCAGACTAGTGAT     |
|                 |            | S-g1-OFF4-R4  | ACTTGACCGGAGGAGCAGACTAGTGAT     |
|                 |            | S-g1-OFF4-R5  | GATCAGCCGGAGGAGCAGACTAGTGAT     |
| S-gRNA-OFF5     | 9          | S-g1-OFF5-F1  | ATCACGTGAGGAGAATGCCAACTTG TTC   |
|                 |            | S-g1-OFF5-F2  | TTAGGCTGAGGAGAATGCCAACTTG TTC   |
|                 |            | S-g1-OFF5-F3  | ACAGTGTGAGGAGAATGCCAACTTG TTC   |
|                 |            | S-g1-OFF5-F4  | CAGATCTGAGGAGAATGCCAACTTG TTC   |
|                 |            | S-g1-OFF5-F5  | TAGCTTTGAGGAGAATGCCAACTTG TTC   |

| <b>Amplified sites</b> | <b>Chromosome</b> | <b>Primers' name</b> | <b>Sequence (5' – 3')</b>       |
|------------------------|-------------------|----------------------|---------------------------------|
|                        |                   | S-g1-OFF5-F6         | GGCTACTGAGGAGAATGCCAACTTG TTC   |
|                        |                   | S-g1-OFF5-R1         | CGATGTCTGTATTTCAA AATGTAGGACCGT |
|                        |                   | S-g1-OFF5-R2         | TGACCACTGTATTTCAA AATGTAGGACCGT |
|                        |                   | S-g1-OFF5-R3         | GCCAATCTGTATTTCAA AATGTAGGACCGT |
|                        |                   | S-g1-OFF5-R4         | ACTTGACTGTATTTCAA AATGTAGGACCGT |
|                        |                   | S-g1-OFF5-R5         | GATCAGCTGTATTTCAA AATGTAGGACCGT |
| S-gRNA-OFF6            | 1                 | S-g1-OFF6-F1         | ATCACGCACGGTCCAGTAGGTTCCCA      |
|                        |                   | S-g1-OFF6-F2         | TTAGGCCACGGTCCAGTAGGTTCCCA      |
|                        |                   | S-g1-OFF6-F3         | ACAGTGCACGGTCCAGTAGGTTCCCA      |
|                        |                   | S-g1-OFF6-F4         | CAGATCCACGGTCCAGTAGGTTCCCA      |
|                        |                   | S-g1-OFF6-F5         | TAGCTTCACGGTCCAGTAGGTTCCCA      |
|                        |                   | S-g1-OFF6-F6         | GGCTACCACGGTCCAGTAGGTTCCCA      |
|                        |                   | S-g1-OFF6-R1         | CGATGTCCTTCCGATTCCACGCAGT       |
|                        |                   | S-g1-OFF6-R2         | TGACCACCTTCCGATTCCACGCAGT       |
|                        |                   | S-g1-OFF6-R3         | GCCAATCCTTCCGATTCCACGCAGT       |
|                        |                   | S-g1-OFF6-R4         | ACTTGACCTTCCGATTCCACGCAGT       |
|                        |                   | S-g1-OFF6-R5         | GATCAGCCTTCCGATTCCACGCAGT       |
