# Supplementary material for: Base editing in bovine embryos reveals a species-specific role of SOX2 in regulation of pluripotency
Source: PubMed Central journal article supplement (PMC9286228; doi:10.1371/journal.pgen.1010307), 2022-07-05
Supplement: pgen.1010307.s012.pdf [file pgen.1010307.s012.pdf]

**S6\_Table. Antibody information**

| Name  | Host   | Company      | Catalog Number | Application |
|-------|--------|--------------|----------------|-------------|
| SOX2  | Rat    | eBioscience™ | 14-9811-82     | IF (1:200)  |
| CDX2  | Mouse  | BioGenex     | CDX2-88        | IF (1:20)   |
| GATA3 | Rabbit | Abcam        | ab199428       | IF (1:200)  |
| OCT4  | Rabbit | Abcam        | Ab181557       | IF (1:200)  |
| NANOG | Mouse  | eBioscience™ | 14-5768-82     | IF (1:100)  |
| SOX17 | Goat   | Bio-techne   | AF1924         | IF (1:200)  |
